# Supplementary material for: Platelet- Rich Plasma Treatment Supported by Ultrasound Detection of Septa in Recurrent Canine Aural Hematoma: A Case Series
Source: MDPI journal article supplement (doi:10.3390/ani13152456), 2023-07-29
Supplement: s1 [file s1]

## **SUPPLEMENTARY MATERIALS: FILE S1**

Tutorial video explaining the ear bandage technique used in the present study:  
<https://youtu.be/CLv8FJnkEl4>

From: <https://www.vetnursing.ie/> available online, last access on 20/07/2023
